# Supplementary material for: Evaluation of the Implementation and Effectiveness of Community-Based Brain-Computer Interface Cognitive Group Training in Healthy Community-Dwelling Older Adults: Randomized Controlled Implementation Trial
Source: JMIR Form Res. 2021 Apr 27;5(4):e25462. doi: 10.2196/25462 (PMC8114157; doi:10.2196/25462)
Supplement: Multimedia Appendix 3 [file formative_v5i4e25462_app3.docx]

Multimedia Appendix: Means and standard deviation for effectiveness measures (Intention-to-Treat Analysis)

|  | Intention-to-Treat Analysis | | | | |
| --- | --- | --- | --- | --- | --- |
|  | Baseline Assessmenta | | Follow-Up Assessment | |
| Effectiveness Measures,  Mean (SD) | Intervention Group  (N = 48) | Control Group  (N = 46) | Intervention Group  (N = 48) | Control  Group  (N = 46) |
|  |  |  |  |  |
| Time Taken for Color Trails Test Part 2, seconds  (N = 91)b | 119.61 (38.87) | 118.60 (34.03) | 114.53 (33.74) | 114.30 (32.93) |
| RBANS Subtestsc |  |  |  |  |
| List Learning | -0.11 (1.09) | 0.12 (0.89) | -0.12 (1.02) | 0.13 (0.97) |
| Story Memory | -0.09 (1.08) | 0.09 (0.91) | -0.09 (1.14) | 0.09 (0.83) |
| Figure Copy | -0.03 (1.00) | 0.03 (1.01) | 0.01 (1.09) | -0.01 (0.91) |
| Line Orientation | 0.02 (1.02) | -0.03 (0.99) | -0.03 (1.04) | 0.03 (0.97) |
| Picture Naming | 0.03 (0.99) | -0.03 (1.02) | 0.00 (1.09) | 0.00 (0.91) |
| Semantic Fluency | -0.11 (1.00) | 0.11 (1.00) | -0.15 (1.02) | 0.16 (0.97) |
| Digit Span | -0.16 (0.99) | 0.16 (0.99) | -0.13 (0.95) | 0.14 (1.04) |
| Coding | 0.02 (0.98) | -0.02 (1.03) | -0.05 (0.99) | 0.05 (1.02) |
| List Recall | -0.04 (1.14) | 0.04 (0.84) | -0.19 (1.13) | 0.19 (0.81) |
| List Recognition | -0.14 (1.21) | 0.14 (0.70) | -0.20 (1.18) | 0.21 (0.72) |
| Story Recall | -0.13 (1.04) | 0.14 (0.95) | -0.16 (1.14) | 0.16 (0.80) |
| Figure Recall | 0.06 (1.06) | -0.06 (0.94) | 0.02 (1.07) | -0.02 (0.93) |
| RBANS Domainsd |  |  |  |  |
| Immediate Memory | -0.20 (1.84) | 0.21 (1.50) | -0.21 (1.85) | 0.22 (1.47) |
| Visuospatial | -0.01 (1.62) | 0.01 (1.54) | -0.02 (1.66) | 0.02 (1.62) |
| Language | -0.08 (1.53) | 0.08 (1.66) | -0.16 (1.77) | 0.16 (1.56) |
| Attention | -0.14 (1.52) | 0.15 (1.52) | -0.18 (1.54) | 0.19 (1.72) |
| Delayed Memory | -0.25 (3.70) | 0.26 (2.49) | -0.52 (3.65) | 0.54 (2.42) |
| RBANS Total Scored | -0.68 (8.14) | 0.70 (6.18) | -1.09 (8.36) | 1.14 (6.83) |
| Berg Balance Scale  (N = 93) | 52.68 (4.68) | 54.35 (2.42) | 53.11 (4.15) | 54.11 (2.58) |
| Gait Speede |  |  |  |  |
| Single Task  (cm/s; N = 92) | 103.32 (23.04) | 102.91 (20.49) | 101.79 (22.58) | 100.84 (19.47) |
| Dual Task  (cm/s; N = 91) | 70.78 (25.63) | 70.37 (23.16) | 68.28 (20.62) | 69.49 (22.71) |
| Dual Task Cost  (N = 90) | -33.47 (16.45) | -32.00 (16.78) | -32.33 (19.94) | -21.55 (15.72) |
| GVI  (N = 90) |  |  |  |  |
| Single Task | 88.79 (6.88) | 88.29 (5.81) | 89.29 (6.23) | 90.99 (5.89) |
| Dual Task | 86.35 (13.85) | 84.49 (14.51) | 85.70 (13.57) | 84.81 (12.08) |

aBaseline differences between the intervention and control group were examined using Pearson’s chi-square tests for categorical data, independent samples t-test for parametric data, and Mann-Whitney U test for non-parametric data.

bTime taken for Color Trails Test Part 2 was missing for 7 participants who exceeded the maximum time provided during 1 or more assessments.

cRBANS subtest scores were standardized within each assessment (i.e., across groups) prior to analyzes.

dRBANS domain scores and total score were derived by summing standardized subtest scores.

ePhysical outcome measures were missing for selected participants for the following reasons: did not complete physical assessment at baseline (N = 2), lack of eligible trials (e.g., not performing serial subtraction during dual task condition, taking too few steps per trial, < 3 trials for GVI derivation; N = 3).
